# Supplementary material for: A combined Raman, DFT and MD study of the solvation dynamics and the adsorption process of pyridine in silver hydrosols
Source: Royal Society of Chemistry journal article supplement (doi:10.1039/b509976e), 2005-10-17
Supplement: b509976e.pdf [file b509976e.pdf]

# Supplementary Material to:

A combined Raman, DFT and MD  
study of the solvation dynamics and  
the adsorption process of pyridine in  
silver hydrosols

Marco Pagliai,<sup>a</sup> Luca Bellucci,<sup>a</sup> Maurizio Muniz-Miranda,<sup>a</sup>  
Gianni Cardini<sup>a,b</sup> and Vincenzo Schettino<sup>a,b</sup>

<sup>a</sup>Laboratorio di Spettroscopia Molecolare, Dipartimento di Chimica, Università di Firenze, Via della Lastruccia 3, 50019 Sesto Fiorentino, Florence, Italy

<sup>b</sup>European Laboratory for Nonlinear Spectroscopy (LENS), via Nello Carrara 1, 50019 Sesto Fiorentino, Florence, Italy

E-mail: [gianni.cardini@unifi.it](mailto:gianni.cardini@unifi.it)

| S              | Assignment     | pyridine (liq.)   |         |         | pyridine (aqueous sol.) |       |         | pyridine (Ag colloid) |         |                     |         |         |         |
|----------------|----------------|-------------------|---------|---------|-------------------------|-------|---------|-----------------------|---------|---------------------|---------|---------|---------|
|                |                | Raman             | Calc. A | Calc. B | Calc. C                 | Raman | Calc. A | Calc. B               | Calc. C | Raman               | Calc. A | Calc. B | Calc. C |
| A <sub>2</sub> | Ag...N stretch | 379 <sup>a</sup>  | 376     | 381     | 377                     |       | 382     | 385                   | 383     | 210 <sup>b</sup> br | 208     | 203     | 205     |
| B <sub>1</sub> | $\nu(13)$      | 407 w             | 410     | 411     | 409                     |       | 394     | 395                   | 397     |                     | 391     | 390     | 388     |
| A <sub>1</sub> | $\nu(27)$      | 604 w/m           | 599     | 594     | 593                     |       | 613     | 607                   | 608     |                     | 420     | 419     | 419     |
| B <sub>2</sub> | $\nu(10)$      | 653 m             | 648     | 642     | 643                     |       | 646     | 640                   | 640     | 623 w               | 637     | 631     | 632     |
| B <sub>1</sub> | $\nu(22)$      | 709 vvw           | 729     | 725     | 727                     |       |         | 722                   | 724     | 649 w/m             | 641     | 636     | 637     |
| B <sub>1</sub> | $\nu(26)$      | 750 vvw           | 762     | 761     | 762                     |       | 769     | 766                   | 766     | 708 w               | 704     | 706     | 709     |
| A <sub>2</sub> | $\nu(25)$      | 885 w             | 918     | 915     | 916                     |       | 921     | 918                   | 912     |                     | 904     | 907     | 909     |
| B <sub>1</sub> | $\nu(12)$      | 942 vw            | 967     | 968     | 971                     |       | 978     | 977                   | 976     | 942 vw              | 977     | 978     | 979     |
| A <sub>1</sub> | $\nu(24)$      | 992 vvs           | 959     | 962     | 971                     |       | 978     | 979                   | 992     | 1008 vvs            | 992     | 992     | 1005    |
| A <sub>2</sub> | $\nu(9)$       | 980 sh            | 1008    | 1011    | 1013                    |       | 1018    | 1020                  | 1017    |                     | 1015    | 1016    | 1017    |
| A <sub>1</sub> | $\nu(11)$      | 1031 vs           | 1020    | 1013    | 1018                    |       | 1022    | 1014                  | 1019    |                     | 1033    | 1027    | 1029    |
| B <sub>1</sub> | $\nu(8)$       | 1020 vvw          | 1041    | 1040    | 1038                    |       | 1046    | 1044                  | 1042    | 1036 vvs            | 1061    | 1056    | 1054    |
| B <sub>2</sub> | $\nu(23)$      | 1052 vvw          | 1054    | 1050    | 1059                    |       | 1064    | 1058                  | 1070    |                     | 1077    | 1071    | 1082    |
| A <sub>1</sub> | $\nu(21)$      | 1069 w            | 1068    | 1062    | 1070                    |       | 1068    | 1062                  | 1070    | 1069 m              | 1066    | 1062    | 1073    |
| B <sub>2</sub> | $\nu(7)$       | 1150 w            | 1169    | 1156    | 1160                    |       |         | 1159                  | 1164    | 1197 sh             | 1189    | 1175    | 1180    |
| B <sub>2</sub> | $\nu(20)$      | 1217 m            | 1224    | 1215    | 1223                    |       | 1227    | 1218                  | 1224    | 1221 m              | 1237    | 1227    | 1235    |
| A <sub>1</sub> | $\nu(6)$       | 1290 <sup>a</sup> | 1282    | 1273    | 1301                    |       | 1290    | 1279                  | 1312    | 1299 vw             | 1295    | 1285    | 1315    |
| B <sub>2</sub> | $\nu(19)$      | 1356 vvw          | 1367    | 1353    | 1356                    |       | 1369    | 1356                  | 1358    |                     | 1379    | 1368    | 1370    |
| B <sub>2</sub> | $\nu(18)$      | 1438 w            | 1438    | 1431    | 1439                    |       | 1444    | 1436                  | 1446    | 1452 vw             | 1459    | 1450    | 1460    |
| B <sub>2</sub> | $\nu(17)$      | 1483 w            | 1466    | 1459    | 1467                    |       | 1473    | 1465                  | 1473    | 1487 vw             | 1481    | 1474    | 1482    |
| A <sub>1</sub> | $\nu(5)$       | 1573 w/m          | 1574    | 1577    | 1596                    |       | 1575    | 1579                  | 1598    | 1575 w/m            | 1571    | 1573    | 1593    |
| B <sub>2</sub> | $\nu(16)$      | 1582 m            | 1576    | 1581    | 1600                    |       | 1588    | 1593                  | 1612    | 1599 m              | 1602    | 1607    | 1627    |
| A <sub>1</sub> | $\nu(4)$       |                   |         |         |                         |       |         |                       |         |                     |         |         |         |

Table 1S: Computed and measured vibrational frequencies for the pyridine molecule, the pyridine/water complex and the pyridine/Ag<sup>+</sup> complex. S = symmetry species of pyridine. Calc. A = BLYP/CEP-31G; Calc. B = B3LYP/CEP-31G; Calc. C = B3PW91/CEP-31G. <sup>a</sup> ref: [1]; <sup>b</sup> Ag hydrosol without chloride anions.

| S              | Assignment   | pyridine (liq.) |         |         | pyridine (aqueous sol.) |          |         | pyridine (Ag colloid) |         |                     |         |         |         |
|----------------|--------------|-----------------|---------|---------|-------------------------|----------|---------|-----------------------|---------|---------------------|---------|---------|---------|
|                |              | Raman           | Calc. A | Calc. B | Calc. C                 | Raman    | Calc. A | Calc. B               | Calc. C | Raman               | Calc. A | Calc. B | Calc. C |
| A <sub>2</sub> | Ag-N stretch |                 |         |         |                         |          |         |                       |         |                     |         |         |         |
| B <sub>1</sub> | $\nu(13)$    | 379 a           | 373     | 377     | 374                     |          | 382     | 383                   | 381     | 210 <sup>b</sup> br | 208     | 200     | 202     |
| A <sub>1</sub> | $\nu(27)$    | 407 w           | 418     | 416     | 414                     |          | 391     | 393                   | 397     |                     | 391     | 389     | 387     |
| B <sub>2</sub> | $\nu(10)$    | 604 w/m         | 607     | 598     | 597                     |          | 613     | 613                   | 614     |                     | 420     | 423     | 422     |
| B <sub>1</sub> | $\nu(22)$    | 653 m           | 660     | 650     | 650                     | 615 w/m  | 646     | 648                   | 648     | 623 w               | 637     | 638     | 639     |
| B <sub>1</sub> | $\nu(26)$    | 709 vvw         | 723     | 715     | 716                     | 649 m    | 726     | 716                   | 716     | 649 w/m             | 641     | 644     | 644     |
| A <sub>2</sub> | $\nu(25)$    | 750 vvw         | 764     | 757     | 758                     |          | 769     | 761                   | 762     | 708 w               | 775     | 764     | 766     |
| B <sub>1</sub> | $\nu(12)$    | 885 w           | 903     | 894     | 895                     |          | 921     | 897                   | 896     |                     | 904     | 885     | 887     |
| A <sub>1</sub> | $\nu(24)$    | 942 vw          | 943     | 939     | 942                     |          | 978     | 952                   | 952     | 942 vw              | 977     | 955     | 957     |
| A <sub>2</sub> | $\nu(9)$     | 992 vvs         | 966     | 961     | 968                     | 1000 vvs | 978     | 978                   | 988     | 1008 vvs            | 992     | 991     | 1002    |
| A <sub>1</sub> | $\nu(11)$    | 980 sh          | 991     | 989     | 990                     |          | 1018    | 998                   | 996     |                     | 1015    | 996     | 995     |
| B <sub>1</sub> | $\nu(8)$     | 1031 vs         | 1026    | 1013    | 1018                    | 1032 vs  | 1022    | 1015                  | 1021    |                     | 1033    | 1030    | 1033    |
| B <sub>2</sub> | $\nu(23)$    | 1020 vvw        | 1025    | 1019    | 1017                    |          | 1046    | 1023                  | 1020    | 1036 vvs            | 1061    | 1036    | 1033    |
| A <sub>1</sub> | $\nu(21)$    | 1052 vvw        | 1060    | 1047    | 1054                    |          | 1064    | 1056                  | 1064    |                     | 1077    | 1068    | 1076    |
| B <sub>2</sub> | $\nu(7)$     | 1069 w          | 1072    | 1060    | 1066                    | 1069 w   | 1068    | 1060                  | 1066    | 1069 m              | 1066    | 1058    | 1067    |
| A <sub>1</sub> | $\nu(20)$    | 1150 w          | 1182    | 1161    | 1165                    |          | 1172    | 1164                  | 1168    |                     | 1189    | 1179    | 1183    |
| B <sub>2</sub> | $\nu(6)$     | 1217 m          | 1231    | 1214    | 1220                    | 1216 m   | 1227    | 1215                  | 1220    | 1197 sh             | 1237    | 1222    | 1228    |
| B <sub>2</sub> | $\nu(19)$    | 1290 a          | 1291    | 1271    | 1293                    |          | 1290    | 1276                  | 1300    | 1221 m              | 1295    | 1285    | 1309    |
| B <sub>2</sub> | $\nu(18)$    | 1356 vvw        | 1378    | 1355    | 1357                    |          | 1369    | 1356                  | 1357    | 1299 vw             | 1379    | 1363    | 1364    |
| B <sub>2</sub> | $\nu(17)$    | 1438 vvw        | 1445    | 1428    | 1435                    |          | 1444    | 1432                  | 1440    |                     | 1459    | 1442    | 1451    |
| A <sub>1</sub> | $\nu(5)$     | 1483 w          | 1473    | 1457    | 1463                    | 1480 vw  | 1473    | 1462                  | 1469    | 1452 vw             | 1481    | 1468    | 1475    |
| B <sub>2</sub> | $\nu(16)$    | 1573 w/m        | 1574    | 1568    | 1584                    | 1574 w/m | 1575    | 1570                  | 1587    | 1575 w/m            | 1571    | 1565    | 1582    |
| A <sub>1</sub> | $\nu(4)$     | 1582 m          | 1576    | 1570    | 1586                    | 1592 m   | 1588    | 1579                  | 1601    | 1599 m              | 1602    | 1592    | 1609    |

Table 2S: Computed and measured vibrational frequencies for the pyridine molecule, the pyridine/water complex and the pyridine/Ag<sup>+</sup> complex. S = symmetry species of pyridine. Calc. A = BLYP/LanL2DZ; Calc. B = B3LYP/LanL2DZ; Calc. C = B3PW91/LanL2DZ. <sup>a</sup> ref: [1]; <sup>b</sup> Ag hydrosol without chloride anions.

| S              | Assignment   | pyridine (liq.) |         | pyridine (aqueous sol.) |       | pyridine (Ag colloid) |          |       |         |         |
|----------------|--------------|-----------------|---------|-------------------------|-------|-----------------------|----------|-------|---------|---------|
|                |              | Raman           | Calc. A | Calc. B                 | Raman | Calc. A               | Calc. B  | Raman | Calc. A | Calc. B |
| A <sub>2</sub> | Ag-N stretch |                 |         |                         |       |                       |          |       |         |         |
| B <sub>1</sub> | $\nu(13)$    | 379 a           | 377     | 373                     |       |                       | 210 bbr  | 204   | 199     |         |
| A <sub>1</sub> | $\nu(27)$    | 407 w           | 408     | 406                     |       |                       |          | 384   | 382     |         |
| B <sub>2</sub> | $\nu(10)$    | 604 w/m         | 605     | 613                     |       |                       |          | 419   | 417     |         |
| B <sub>1</sub> | $\nu(22)$    | 653 m           | 605     | 663                     |       |                       | 623 w    | 644   | 653     |         |
| B <sub>1</sub> | $\nu(26)$    | 709 vvw         | 707     | 702                     |       |                       | 649 w/m  | 647   | 661     |         |
| A <sub>2</sub> | $\nu(25)$    | 750 vvw         | 742     | 733                     |       |                       | 708 w    | 697   | 702     |         |
| B <sub>1</sub> | $\nu(12)$    | 885 w           | 885     | 843                     |       |                       | 747      | 747   | 741     |         |
| A <sub>1</sub> | $\nu(24)$    | 942 vw          | 904     | 872                     |       |                       | 882      | 882   | 847     |         |
| A <sub>2</sub> | $\nu(9)$     | 992 vvs         | 954     | 956                     |       |                       | 942 vw   | 904   | 883     |         |
| A <sub>1</sub> | $\nu(11)$    | 980 sh          | 920     | 894                     |       |                       | 1008 vvs | 988   | 991     |         |
| A <sub>1</sub> | $\nu(8)$     | 1031 vs         | 1034    | 1039                    |       |                       | 1036 vvs | 920   | 891     |         |
| B <sub>1</sub> | $\nu(23)$    | 1020 vvw        | 915     | 908                     |       |                       |          | 1065  | 1069    |         |
| B <sub>2</sub> | $\nu(21)$    | 1052 vvw        | 1056    | 1061                    |       |                       |          | 941   | 928     |         |
| A <sub>1</sub> | $\nu(7)$     | 1069 w          | 1077    | 1088                    |       |                       |          | 1080  | 1083    |         |
| B <sub>2</sub> | $\nu(20)$    | 1150 w          | 1189    | 1199                    |       |                       | 1069 w   | 1074  | 1082    |         |
| A <sub>1</sub> | $\nu(6)$     | 1217 m          | 1237    | 1245                    |       |                       | 1197 sh  | 1209  | 1218    |         |
| B <sub>2</sub> | $\nu(19)$    | 1290 a          | 1294    | 1285                    |       |                       | 1221 m   | 1255  | 1261    |         |
| B <sub>2</sub> | $\nu(18)$    | 1356 vvw        | 1380    | 1396                    |       |                       | 1299 vw  | 1324  | 1316    |         |
| B <sub>2</sub> | $\nu(17)$    | 1438 vvw        | 1451    | 1463                    |       |                       |          | 1402  | 1414    |         |
| A <sub>1</sub> | $\nu(5)$     | 1483 w          | 1479    | 1494                    |       |                       | 1452 vw  | 1476  | 1481    |         |
| B <sub>2</sub> | $\nu(16)$    | 1573 w/m        | 1580    | 1582                    |       |                       | 1487 vw  | 1500  | 1511    |         |
| A <sub>1</sub> | $\nu(4)$     | 1582 m          | 1591    | 1588                    |       |                       | 1575 w/m | 1586  | 1586    |         |
|                |              |                 |         |                         |       |                       | 1592 m   | 1627  | 1622    |         |

Table 3S: Computed and measured vibrational frequencies for the pyridine molecule, the pyridine/water complex and the pyridine/Ag<sup>+</sup> complex. S = symmetry species of pyridine; Calc. A = MP2/CEP-31G; Calc. B = MP2/LANL2DZ; <sup>a</sup> ref: [1]; <sup>b</sup> Ag hydrosol without chloride anions.

| BLYP    |         | B3LYP   |         | B3PW91  |         | MP2     |         |
|---------|---------|---------|---------|---------|---------|---------|---------|
| CEP-31G | LanL2DZ | CEP-31G | LanL2DZ | CEP-31G | LanL2DZ | CEP-31G | LanL2DZ |
| 106     | 96      | 103     | 94      | 108     | 97      | 128     | 120     |
| 372     | 371     | 380     | 377     | 376     | 374     | 379     | 375     |
| 411     | 421     | 414     | 419     | 412     | 417     | 414     | 412     |
| 611     | 620     | 605     | 611     | 605     | 611     | 623     | 632     |
| 645     | 657     | 640     | 648     | 640     | 648     | 649     | 662     |
| 720     | 719     | 718     | 712     | 720     | 713     | 702     | 700     |
| 763     | 761     | 764     | 757     | 764     | 758     | 743     | 735     |
| 917     | 900     | 915     | 892     | 916     | 893     | 889     | 845     |
| 974     | 950     | 975     | 946     | 977     | 948     | 902     | 870     |
| 974     | 978     | 976     | 974     | 987     | 982     | 916     | 886     |
| 1013    | 993     | 1014    | 992     | 1017    | 992     | 921     | 909     |
| 1021    | 1028    | 1016    | 1015    | 1018    | 1020    | 976     | 977     |
| 1045    | 1028    | 1044    | 1022    | 1043    | 1020    | 1045    | 1047    |
| 1063    | 1065    | 1058    | 1053    | 1067    | 1061    | 1070    | 1071    |
| 1065    | 1070    | 1060    | 1058    | 1069    | 1065    | 1075    | 1086    |
| 1173    | 1186    | 1160    | 1164    | 1165    | 1169    | 1195    | 1205    |
| 1225    | 1229    | 1216    | 1212    | 1223    | 1218    | 1243    | 1248    |
| 1290    | 1296    | 1279    | 1275    | 1310    | 1299    | 1312    | 1298    |
| 1368    | 1375    | 1356    | 1354    | 1358    | 1355    | 1390    | 1402    |
| 1446    | 1450    | 1438    | 1432    | 1447    | 1440    | 1462    | 1469    |
| 1471    | 1475    | 1465    | 1459    | 1472    | 1466    | 1489    | 1499    |
| 1573    | 1575    | 1577    | 1569    | 1596    | 1586    | 1583    | 1584    |
| 1589    | 1584    | 1593    | 1578    | 1613    | 1595    | 1608    | 1602    |

Table 4S: Computed vibrational frequencies for the pyridine/Ag(0) complex.

## References

- [1] T. D. Klots, *Spectrochim. Acta Part. A*, 1998, **54**, 1481–1498.
